# Supplementary material for: Expression and strain variation of the novel “small open reading frame” (smorf) multigene family in Babesia bovis
Source: PubMed Central journal article supplement (PMC3459096; doi:10.1016/j.ijpara.2011.10.004), 2012-02

A.

BBOV\_I001180 No5' (1) -- MVVFNMLWKL FVVVAFGLSATV TSTVVAQE QPKKEESLGGFFSNEK E STVSKFSEVKEATGTS TPGNSDPP EPPMFTVEWYLLPKFLNRAT RYMLPWN

BBOV\_I003890 (1) -- MVAFNMLWKL S VVVALGLSATATSTDVVAQE QPKKEELNGISTEKASTASK DEEVKEATGTS TQGNSDPEEFSKFSVSEWYLLSKFLNRAS LIDMLPWN

BBOV\_I004150 (1) -- MIAFNMLWKL FVVVAFGLSATATSTEDG-----PLSKNEESVTKFEVSKSE-----TDEPFKFSVSEWYLLPKPENRAT RYILPYG

BBOV\_IV007970 (1) -- MVGIKTLP T I C I L V A F G L S A T V T A T D V V Q E Q P K K D S V V S G S L R K N E E S V A K F Q E V S K S E -----TDEPFMFSVSEWYLLPKFLNRAT RYILPWT

BBOV\_I001380 (1) -- MVSFN T L P K L C V L V A F G L S A T V T S A E V V P E Q - P K E Q L D I G S L L K N E E P S T K F E V V K E T T K I E T Q L H S E T G E P M F S V D W Y L L P K P E N R E Q L R D D L P F D

BBOV\_III000050 (1) -- MVAFNMLWKL C A L V A L G L S A T A T S T E V A Q E Q P T Q E G L D I G I P G K E Y E Q A T E L V K V P E Q D N T D S E K E I A T D E P F K Y S V E W Y L L P K P E N R K Q L C H D L P W Y

BBOV\_II000060 (1) -- MVAFNMLWKL S I L V A F G L S A T A T S T E V A Q E Q P T Q E G L D I G I P G K E Y E Q A T E L V K V P E Q D N T D S E K E I A T D E P F K Y S V E W Y L L P E P E N R A A L S F L P W S

BBOV\_IV007930 (1) -- MVAFN L W K F C V V L T F G L S A T V T S T D V A Q D Q F T H K A L D S G I S G K E L K H D T E F V E V Q E E N T K I G K H T K S V E E A I Y S V E W H L L P N P E S R A S R E E L P S D

BBOV\_III011930 minus ins (1) -- MVAFNMLWKL S V V V A F G L S T T V T S T D V A Q E L T Q D T L D G G F F C E N G L I A T E S Q E V V E G D N T D V E Q I E T P E Q M Y S V D S H L L P E T E S V T A L R R S L P S Y

BBOV\_I004220 (1) -- MVAFNMLWKL C V V V A F G L S V T A T D V S Q E E - - P K K E S L V S G F S G -----TDEHGT E P K F S T E W Y L L P K P E N R A A L R Y V L P R S

BBOV\_I001120 (1) -- MVAFN S F S K L C V V V A L G L S A T V T S T E V A Q E Q P K K E S F V S R F F G K R E T A T K R V E V Q E K E N S D S E E D I E T G E P S N Y S V E W Y L L P K F L N R A T R Y R L P R D

BBOV\_II006810 (1) -- MVAFN I L W K L C A L G - - - L S A T A T S S D V A Q E Q P K K E S F L S R F F G K K E E A K T Q F V E V Q E R D N T D G K E D I E T G E P P R Y S V E W H L L P K P E N R A A L S F L P R S

BBOV\_III002340 (1) -- MVAFN T F S K L C V V V A F G L S A T V T A T D V A Q E Q P K K E S V V S G S F R K G E S A T K E H K L P E - - - - R N K T Y I D P E E P M F S T E W Y L L P K P E N R A Y L L E K L P E D

BBOV\_II000400 (1) -- MVSFNMLWKL C V I V A F G L S A T V T A T D V A K E Q P K K E S L D N R F P R K N E E P - - - - - F M S V E W Y L L P E P E N R A C L L E K L P E D

BBOV\_I003880 (1) -- MVNLN T L P R I C V V V V F G Y S A T V T S T E V A Q E K P K K E S L D S G F F H K N K P S T E L P E V E - - - - - E S F M C S V E W Y L L P K P E N R V C L L E K L P E D

BBOV\_I001420 minus ins (1) -- MVSFNMLWKL FVVVAFGLSATV TSTDISQE QFNKAS FVSRFLFGKKEHDTKFHEITPQINTETE ENT DPE EPPRYSVEWHLLPKQENRDAIRYFMPWY

BBOV\_IV006420 minus ins (1) -- MVAFKMLWKL C V V V A F G L S A T V T S T E V A Q E K P K K K S L D S A L S S K E E P A V A T Q E A T E P Q N T D T E N T E T V D P M F S F W E L L P K P E N R A A L R Y V L P W N

BBOV\_II002280 minus ins (1) -- MVSFN T F S K L C V V V A L G L S A I A T S T E V A Q E Q P K K E S F V S R F F G K N E K S A T K S H D V S E P T K I D T Q K H S D T G H F - K Y D V E W Y L L P K P E N R A A L R G I L S W F

BBOV\_IV006390 no5' minus ins (1) -- I V S L N T L W K L S V L V A F G V S T T A T A T D V A Q E Q P K K E E L E N G S L R N K E K P G T K F V E V K E A T R I T T K R N S D P N D P P M F S V E W Y L L P K F L N R A S E R E R L P W F

BBOV\_II002290 (1) -- MVAFN T F S K L C V V V A L G L S A I A T S T E V A Q E Q P K K E S F V S R F F G K N E K S A T K S H Y I S E P K K I T T Q E N T D T A H L L M F P T E W Y L L P Y F I N R K Y L L K A L P E D

BBOV\_II006800 (1) -- MVAHRMLWKL C V V V A F G L S A T V T A T D V A Q E Q P K K E E L K S G S L R N G E S T T K R Q E V P E P T K T D T K E D T D P K G F S K F S V E W Y L L P K F I N R A T R D I L P W N

BBOV\_I001130 (1) MKT V S I N K L S K L C A L V A L G L P S I A T S T D V A Q E Q P K K E S F L G R F F G K K P E A A T K R V E V Q E K E N S D S E E D I E T G E P S N Y S V E W Y L L P K F L N R A I R Y L L P S S

BBOV\_I001170 (1) -- MVAFN T L W K L C V V V A F G L S A T A T C T D V A Q E Q P K K E S F V S R F F G K K E E A K T Q F V E V Q Q E E I T K A Q E N T D A E E P P K Y S V E W Y L L P K F Q N R K H L R D K L P Y D

BBOV\_I001160 (1) -- MVAFNMLWKL C I V V A F G L S A T S T D V D Q E Q P K K E S F V S R F F G K K E E A K T Q F V E V Q Q E E I T K A Q E N T D A E E P P K F S V E W Y L L P K F I N R A T R D K L P W I

BBOV\_III000020 (1) -- MVNVNRL P K L C V V V A F G L S A T V T S T D V A K E Q P K K E S F V S R F F G K R N S T K S H E K A I P M K T K S Q E N T D K T D P P K Y S L D W Y L L P K P E N R D A L C Y I L P H D

BBOV\_III000690 (1) -- MVA S N L W K L S V V V A F G F S A T A T S T E V A Q E Q P K K E S F V S R F F G K K E E P T K F E E V S K S D N V E T Q E D T E T E P P K Y S V E W L L P K P E N R K I R Y R L P L E

BBOV\_III002350 (1) -- MVAFN T F S K L C V V V A F G L S A T V T A T D V A Q E Q P K K E S F L S R F F G K K E A A T E P M D M Q K Q E N I E S Q H I N T T G F S N L S V E W L L L P R E N R R A L T Y L P D D

BBOV\_III007710 (1) -- MVA L N L W K L S I V V A F G F S A T A T S T D I A P E Q P K K E S F L S R F F G K N E K S A T K S H D V S E P T K I D T Q K H S E T G - L F K Y D V E W Y L L P K F L N R F F L S R C H L L S

BBOV\_III007740 (1) -- MVA L N L W K L S I V V A F G F S A T A T S T D I A P E Q P K K E S F L S R F F G K N E K S A T K S H D V S E P T K I D T Q K H S E T G - L F K Y D V E W Y L L P K P E N R A A L S F L P W Y

BBOV\_III011960 (1) -- MVAFNMLWKV C I V G A L G F S A T V T S T E V A Q E Q S T Q E G L D K G V C S K E K E Q A T E L V E V P E P T R I D T P K H A D I V N P P K Y S V E W Y L L P K F Q N R Y L R D K L P W H

BBOV\_III001320 (1) -- MVSFN T I L K L G A V V A F G L S T T A T S T E V A Q E Q P K K E S F L S R F F G K R L E P T K F E E V S K S D N V E T Q E N T D T D P P M F T V E W Y L L P K P E N R K Q L R E R L P P K

BBOV\_II001390 (1) -- M L S F N T L P K L C V L V A F G L S A T V T S A E V V P E Q P K K E S I G S G F S R K N E E P S T K F V E V K E T T K I E T Q L H S E T E P P K Y S V E W Y L L P K P E S R A A L R Y F L P T V

BBOV\_II004160 (1) -- M I G L N L W K L F V V V A F G F F A T A T S T D V A Q D Q F T Q E A L V S - - K E N - - - E V A T E P Q E V P V P T K A E T K K Q T E T S K Q N K F V E W L L L P E P E N R K Q L R E R L P R D

BBOV\_II007780 (1) -- M L G F K T L P K L C A V V A F G F F T I T T S E L A P E Q P E K E S S D I G S L R D N E E P S T K F E L Q K P P K T F T P N T K T G E P S N L S L E W L L L P E F K S R K R L D E L P E D

BBOV\_II007820 (1) -- MVAFNMLWKL C V A V A F G L S A T V T A T D V A Q E Q P K K E S L V S R F F G K R N E N F T K S H E K A I P M K T K S Q E N T D K T D P P K Y S L D W Y L L P K P E N R D A L C Y I L P H D

BBOV\_I003860 (1) -- M I G L N L C K L F I V V A L G F F A T A T S T D V A Q D Q F T Q E A L V S - - K E D - - - E V A T E P Q E V P I P T K A E T K K Q T E T S K R N M K F V E W L L L S E P E N R K Q L R E R L P R D

BBOV\_I003850 (1) -----M E S L S S S G I R Y L R Y C H I T D V A L D Q P K K E S L A S R F F G K R - F P G K E S Q D S A E A T K N T G E N T E T A D P P K Y S V E W L L P K P E N S A H L L E K L A F D

BBOV\_I005150 (1) -- MVAFNMLWKV C I V G A L G F S A T V T S T E V A Q E Q S T Q E G L D K G V C S K E K E Q A T E L V E V P E P T R I D T P K H A D I V N P P K Y S V E W Y L L P K F Q N R R Y L R D K L P W H

BBOV\_I001370 (1) -- MVAFNMLWKF S I V V A L G L S A T A T S T E V A Q E K P K K E S F V S R F F G K S E E P D T K F Q E V L A A K T D K G - - - - G G L F N Y D V E W L L E S K P E N R A A L K A L P S D

BBOV\_IV000090 (1) -- MVAFN T L P K L C V V V A F G L S T T A T S T E V A Q E Q P K K E S V S G S L R K N E S T T K F V D I M L P T K I E T Q L H C E T G E P S S L S L E W L L L P E Q S R K R L D E L P F D

BBOV\_IV000040 (1) -- MVAFN T L P K L C I V V A F G L S T T A T S T E V A Q E Q P K K E S F V S R F F G K K E G P A A T V D V K E P T K T D T Q E H N D T R G L F M Y D V E W L L E S K P E N R A A L R K A L P S D

BBOV\_IV007960 (1) -- M V T F N I L W K L C I V V A F G L S A T V T S T D V A Q E Q P K K E S F L S R F F G K K E S T A T K F V E K E A S S H N T Q G Y S D P N D P P K Y S V E W Y L L P K P E N R A A L R K A L P S D

BBOV\_IV012140 (1) -- MVSFN T L S K L C I V V A F G L S T T A T S T D V A Q E K P K K E S L S R F F G K K E E A K T Q F V D V K E P T K T D T Q E H N N T R G L F M Y D V E W L L E S K P E N R A A L R K A L P S D

BBOV\_IV006430 (1) -----M L W K L C V L V A F G L S D T V T A T D V A K D Q P K K E S L V S R F F G K G E Q R A T E P Q Q -----V S D P P K Y S V E W Y L L P E P E S R K E L R E E L P W H

BBOV\_I001180 No5' (99) LQTA V P E D C K R P I L P V V E K Q I R N Y F S W L E K T K Q K ----- E S S S A Q G E T T N I S Q P P K K S F T S R F F G K K D A S T V K P V D V P D L P K Y S L E W Y F V Q

BBOV\_I003890 (99) LQTA V P E D C K K P I L P V V E K Q I R D H F S W L E K Q K Q K Q K ----- E S S S S Q G K T T D V S Q P K K E S F L S R F F N ---- K N N K P V D I P E L P K Y S L E W Y F V Q

BBOV\_II004150 (78) F E A C L P E Y C C K P I L P A V E N I R N H F S W V E K Q K Q K ----- E S D S A Q R K T T D V G Q P S K K S F T N ----- A S A A D P V D V P E P P K Y S L E W Y F V Q

BBOV\_IV007970 (90) M I L S V P E D C K K P I L P A V E K R I R N H F S W V E K Q K Q K ----- E S D S A Q R K T T D V G Q P P K K S F T S R F F G K K D A S A N T P V D V P E L P K F S F E W Y F V Q

BBOV\_II001380 (98) M A K D V P E D C D E P I Y P A L E K R I R K F F S I R G L I F R N ----- E S S S A Q G E T T N I S Q P P K K S F T S R F F G K K D A S T V K P V D V P D L P K Y S L E W Y F V Q

BBOV\_III000050 (99) L F R L V P K N C K K P I S T A L M N Q I R W Y F S R R D ----- E S S S A Q G E T T N I S Q P P K K S F T S R F F G K K D A S T V K P V D V P D L P K Y S L E W Y F V Q

BBOV\_II000060 (99) L S I S V P T N C K K P I S T A L M N Q I R W Y F S R R D ----- E S S S A Q G E T T N I S Q P P K K S F T S R F F G K K D A S T V K P V D V P D L P K Y S L E W Y F V Q

BBOV\_IV007930 (99) L A A K V P K D C N K S I A P P V M N I R L W Y F S W R D ----- E S S S A Q G E T T N I S Q P P K K S F T S R F F G K K D A S T V K P V D V P D L P K Y S L E W Y F V Q

BBOV\_III011930 minus ins (99) L A D K V P E D C N E P I D P E V E E I R K Y L P I Y T ----- E S S S A Q G E T T N I S Q P P K K S F T S R F F G K K D A S T V K P V D V P D L P K Y S L E W Y F V Q

BBOV\_II004220 (77) L A K D V P E D Y N K P I D P A L G K V I R K Y F L W Y G ----- E S S S A Q G E T T N I S Q P P K K S F T S R F F G K K D A S T V K P V D V P D L P K Y S L E W Y F V Q

BBOV\_I001120 (99) L Y D V P L D C N K P I A P E V E K R I R N Y F S I H T ----- E S S S A Q G E T T N I S Q P P K K S F T S R F F G K K D A S T V K P V D V P D L P K Y S L E W Y F V Q

BBOV\_II006810 (96) L S R K V P E D C N E P I G P K L E K Q I R N Y F S I Y G ----- E S S S A Q G E T T N I S Q P P K K S F T S R F F G K K D A S T V K P V D V P D L P K Y S L E W Y F V Q

BBOV\_III002340 (95) V A K D V P E D C D E P I D P A L E K R I R K F F S I R G L I F T S ----- E S S S A Q G E T T N I S Q P P K K S F T S R F F G K K D A S T V K P V D V P D L P K Y S L E W Y F V Q

BBOV\_II000400 (75) V A K D V P E D C D E P I D S A V E K R I R K F F S I R G L I F T S ----- E S S S A Q G E T T N I S Q P P K K S F T S R F F G K K D A S T V K P V D V P D L P K Y S L E W Y F V Q

BBOV\_I003880 (85) V A K D V P W D C D E P I E P S L E K R I R K F F S I R G L I F T S ----- E S S S A Q G E T T N I S Q P P K K S F T S R F F G K K D A S T V K P V D V P D L P K Y S L E W Y F V Q

BBOV\_I001420 minus ins (99) L S I S V P K D C N E P I G P Y L E K R I R K Y F S I N I ----- E S S S A Q G E T T N I S Q P P K K S F T S R F F G K K D A S T V K P V D V P D L P K Y S L E W Y F V Q

BBOV\_IV006420 minus ins (99) L A K D V P M N C E K P I G P E M E E R I R E H F L L K G G L E N N ----- E T D T E P H E V S D L E N T D N E V Q M D T Q D L P R F S V K W L L L P

BBOV\_II002280 minus ins (98) M A R D V P E D C N V P I S P K L E K R I R E H F S W I E Q K T V I H S S S A D S N S I N V G N P M K K S I V N G P S G K K E E P T T E S H D I S Q P T N T D T Q E N I N E E E P P M Y S V E W H L L P

BBOV\_IV006390 no5' minus ins (99) A Q N T V P R D C N Q P I A P P T E K Y I R N H F S W V E K Q K Q K ----- E S S S A D A T T T N V S Q P K K G S F L S R F F S K N N K Q V D I P D L P K Y S L E W Y F L P

BBOV\_II002290 (99) L A K K V P E D C N E P I D P K V E E R I R E F F L F S V ----- E S S S A Q G E T T N I S Q P P K K S F T S R F F G K K D A S T V K P V D V P D L P K Y S L E W Y F V Q

BBOV\_II006800 (99) L Q N S V P K D C N E P I L P V I E K K I R K Y F S W V E Q K P E S ----- R G A L L Y C T G W ----- E S S S A Q G E T T N I S Q P P K K S F T S R F F G K K D A S T V K P V D V P D L P K Y S L E W Y F V Q

BBOV\_I001130 (101) L A K K V P E D C N E P I D S L V E N E I R K H F I W Y G ----- E S S S A Q G E T T N I S Q P P K K S F T S R F F G K K D A S T V K P V D V P D L P K Y S L E W Y F V Q

BBOV\_I001170 (99) L A Y F V Q R N C N S P I S P E V E E R I R E Y L L I Y T ----- E S S S A Q G E T T N I S Q P P K K S F T S R F F G K K D A S T V K P V D V P D L P K Y S L E W Y F V Q

BBOV\_I001160 (99) I Q N T V P R D C N Q P I A S K S E L I R E Y I P R T Y ----- E S S S A Q G E T T N I S Q P P K K S F T S R F F G K K D A S T V K P V D V P D L P K Y S L E W Y F V Q

BBOV\_III000020 (99) L L D A L P E D C N E P I E P A L E K R I R E R F S I R I E K K Q R P ----- E S S S A Q G E T T N I S Q P P K K S F T S R F F G K K D A S T V K P V D V P D L P K Y S L E W Y F V Q

BBOV\_III000690 (99) L A Q C V P K S C N K T I L P V V E K R I R E F F S I S E K D Q R S R R L H S D T F T I ----- E S S S A Q G E T T N I S Q P P K K S F T S R F F G K K D A S T V K P V D V P D L P K Y S L E W Y F V Q

BBOV\_III002350 (99) L A S K V P M R Y I K P I D S E L E E R I R E F F S I S A K E Q L Q K R L A S Y G F Q Q ----- E S S S A Q G E T T N I S Q P P K K S F T S R F F G K K D A S T V K P V D V P D L P K Y S L E W Y F V Q

BBOV\_III007710 (98) P C V C H M T V M R Q ----- E S S S A Q G E T T N I S Q P P K K S F T S R F F G K K D A S T V K P V D V P D L P K Y S L E W Y F V Q

BBOV\_III007740 (98) L S L S V P Y D C N E A T E T E V E Q D I R E Y F L W S D ----- E S S S A Q G E T T N I S Q P P K K S F T S R F F G K K D A S T V K P V D V P D L P K Y S L E W Y F V Q

BBOV\_III011960 (99) L Y N A V P K D C N D P I D P L V E K E I R E F F S V R S ----- E S S S A Q G E T T N I S Q P P K K S F T S R F F G K K D A S T V K P V D V P D L P K Y S L E W Y F V Q

BBOV\_III001320 (99) L A D A V P E N C K E A T D P S V V D I R W L L E L L G K K Q L S N K S ----- E S S S A Q G E T T N I S Q P P K K S F T S R F F G K K D A S T V K P V D V P D L P K Y S L E W Y F V Q

BBOV\_II001390 (99) L A N T V P K N C N E P I L P V V E K R I R K C I A I Y A ----- E S S S A Q G E T T N I S Q P P K K S F T S R F F G K K D A S T V K P V D V P D L P K Y S L E W Y F V Q

BBOV\_II004160 (95) L A A M V P E D Y D E P I K P F I E K K I R T E F S F S V Q K Q G S M I L D S Y G R N M ----- E S S S A Q G E T T N I S Q P P K K S F T S R F F G K K D A S T V K P V D V P D L P K Y S L E W Y F V Q

BBOV\_II007780 (99) L A I D V S M D F N E P I K S K T R N I R K F F S I S E K E Q Q A K R L A S Y G F ----- E S S S A Q G E T T N I S Q P P K K S F T S R F F G K K D A S T V K P V D V P D L P K Y S L E W Y F V Q

BBOV\_II007820 (99) L L D A L P E D C N E P I E P P L E K R I R E R F S I R I E K Q Q R P ----- E S S S A Q G E T T N I S Q P P K K S F T S R F F G K K D A S T V K P V D V P D L P K Y S L E W Y F V Q

BBOV\_I003860 (95) L A A M V P E E Y D E P I K P F I E K K I R T E F S F S V Q K Q G S M I L D S Y G R N F ----- E S S S A Q G E T T N I S Q P P K K S F T S R F F G K K D A S T V K P V D V P D L P K Y S L E W Y F V Q

BBOV\_I003850 (91) M A K D V L K D C D E P I D S A V E K L I R K H F S V L Q Q Y K P K T F V Y E N G ----- E S S S A Q G E T T N I S Q P P K K S F T S R F F G K K D A S T V K P V D V P D L P K Y S L E W Y F V Q

BBOV\_I005150 (99) L Y N A V P R D C N E P I S P W V E K E I R E F F S V C S ----- E S S S A Q G E T T N I S Q P P K K S F T S R F F G K K D A S T V K P V D V P D L P K Y S L E W Y F V Q

BBOV\_I001370 (95) L A T H V P K D Y K K R M W S G I E Y Y V Y V F K I Y A T ----- E S S S A Q G E T T N I S Q P P K K S F T S R F F G K K D A S T V K P V D V P D L P K Y S L E W Y F V Q

BBOV\_IV000090 (99) L A I D V S M D F N E P I K S K T R N I R K F F S I S E K E Q Q A K R L A S Y G F ----- E S S S A Q G E T T N I S Q P P K K S F T S R F F G K K D A S T V K P V D V P D L P K Y S L E W Y F V Q

BBOV\_IV000040 (99) L A K D V P E D C N K R M W S G L E Y I S K F F K F Y A ----- E S S S A Q G E T T N I S Q P P K K S F T S R F F G K K D A S T V K P V D V P D L P K Y S L E W Y F V Q

BBOV\_IV007960 (99) L A E M V P K D Y K R R I W S A L E G C I I K F K I E A ----- E S S S A Q G E T T N I S Q P P K K S F T S R F F G K K D A S T V K P V D V P D L P K Y S L E W Y F V Q

BBOV\_IV012140 (99) L A K D V P E D C N K R M W S G L E Y I S K F F K F Y A ----- E S S S A Q G E T T N I S Q P P K K S F T S R F F G K K D A S T V K P V D V P D L P K Y S L E W Y F V Q

BBOV\_IV006430 (80) F L L A V P E D C N Q P I L P V V E K R I R K F L S M T P Q N K R L Y R I C S T Y K S I ----- E S S S A Q G E T T N I S Q P P K K S F T S R F F G K K D A S T V K P V D V P D L P K Y S L E W Y F V Q

BBOV\_I001180 No5' (185) KPENRKLDRRLPYATKAFVAPDCREPIAPVLEKRIIRDYFSLYTVDWYLLPKQENRIALRYMLP SDLAAKVPEDCNEPIDFEVEAIIKEHFTVTEKKQRP

BBOV\_I003890 (185) KPENRKHLRERLPYASKGVVAEDCREPIPPVLEKRIIRDYFSLYNVDWYLLSEPENRSALRYVLPEDLAAKVPEDCNEPIDSTELEELIREHFTVVEKKQRP

BBOV\_II004150 (157) KPENRKLDRRLPYSTKAFVAPDCREPIAPVFEKRIIRDYLSLYSVDWYLLPEPENRTALRYMLP EDLAAKVPEDCNEPIDFELEELIREHFTVIEKKQRP

BBOV\_IV007970 (176) KPENRKLDRRLPYSTKAFVAPDCREPIAPVFEKRIIRDYLSLYSVDWYLLSKEENRIALRYLPSDLAAKVPEDYNEPIDFEVEELIREHFTVVEKKQRP

BBOV\_II001380 (154) KPQNRRLRDKLPWHLYNAVPRDCNEPISPWVEKEIREFFSVCSVEWYLESKFINRAALRYAIPSYLAEKVLDCNEPISFATERRIRGFYSYSEEQQRL

BBOV\_III000050 (135) KQENRTALRKLPLIDVAAVIPEDCRKAI PSVYEKYIWTYFSLSAVEWLLLESKPENRSLIKSLPSDLAKGVPEDVKNPIDFAVEERIREYFAFTMPGLR-

BBOV\_II000060 (135) KQENRTALRKLPLIDVAAVIPEDCRKAI PGVYESYIWTYFSLSAVEWLLLESKPENRSLIKSLPSDLAKGVPEDVKNPIDFAVEERIREYFAFTVPDLR-

BBOV\_IV007930 (135) KPENRAALLELPSDVAALVSKDCNKPVTTIVENYIWKYFNLSPVDWYLLPKPE SRACLREELPSELGAKI PEDCNEPIDFLVENEIRKHFSSMHKREP

BBOV\_III011930 minus ins (135) LPGNRAALRSSLPKDLAAKVPFNRRSVDPAVEELIRKYFSLCAVDWYLLPLPENRASLRYTLPKYLAAMVPEDCDTLTEFKLEKRIKFFSLSEKEQQK

BBOV\_II004220 (113) MPESRAALRYVLPKDLADMVPENFNKPIAPLVENDIRKHFLWYAVEWYLLPKPENRSDLRYLKPNLAKDVPEDFNVPIITFKLEKDIRKYLFLIRKKQK-

BBOV\_I001120 (135) KPLNRAALRYSLPSNLSKKVPEDCREPIKPEVEERIRKYFSLYAVDWYLLPKPENRATLRNSLPRDLASKVPEDCNQPIEFVVERIREFSLCSVWEVYH

BBOV\_II006810 (132) EPESRAALRKALPSDIAKDVPEDCNKRMCWGLEEYIFKFFKIYATGWYLLPEPESRAALRYVLPRLS LAKYVPEDCNEPIDFEVENEIREFSSKTFFQKQK

BBOV\_III002340 (151) KPENRSRLIEKLPFDVAKDVPEDCNEPILPVLEKHIRDYF SWLGRWYLLPEPQSRAALRKALPSDVAETVPEDCDEPIDFEVEQYIKRFSSFSVQKQK

BBOV\_II000400 (128) SLDSSFTNKEDEPSSKSEQVPKPESMDTE---EETDTAGPPKFSVEWYLLPKPINRGLRDKLPWEMRNAVPEDCNEPIDLVVEKRIKFFSLSEKEQIL

BBOV\_I003880 (138) SLDGSFSSKEDEPSSKSEQVPEPENMDSQ---EETDTAGPPKFSVEWYLLPKPENRKHLRNELPFDLAVALPEDCNEPIDLVVEKRIKFFSLSGKNQRL

BBOV\_I001420 minus ins (135) FPENRAALRKALPSDIAEDVPEDCNKRMCWGLEEYIQKFFALYAATWYMLPEPESRNALRYVLPKDLADKVPEDCNEPIDTEVEKRVKRYISEAFQQQRL

BBOV\_IV006420 minus ins (170) KPENRTALRYLLPLSLARRVPEDYNEPIAPLVEKDIRKHFTLYTGWYLLPKPENRSALRHSLPKDLARMVPEDCNEPIDFELEQDIKTFSSFAQQQRF

BBOV\_II002280 minus ins (198) KPENRAAIRVFMPLYLAEDVPKDCSVPVSPKLEKRIREHFSLHGIEWFMLPKPENRAALRFLMPLSNLAAMVPEDCDEPIDFALEKRIVKYFTLNLGNLNPRL

BBOV\_IV006390 no5' minus ins (181) KEESRKLDRRLPYASKGVVASDCRESIAPVFEKRIIRDYLSLYTVDWYLLPKPENRAALRNSLPEDLAAKVPEDCNEPIDFVEELIREHFTVIEKKQRP

BBOV\_II002290 (128) -----

BBOV\_II006800 (143) -----

BBOV\_I001130 (130) -----FDWYLLTLPQNRSAALRKKLPRDGAKM LPE S-----

BBOV\_I001170 (128) -----VDWYLLPEPESRTALRYSLPSNLASKVPENCNNEPIDFELEKRIKRYFSSLQKKKRL-----

BBOV\_I001160 (128) -----RWYLLPEPESRTALRYSIPKDLANEVPEDYNEPIDKEVVKRIKKFSSLSINKQRA-----

BBOV\_III000020 (133) -----TVAMQDFQLNNDSGTSFFVMQPL-----

BBOV\_III000690 (143) -----

BBOV\_III002350 (143) -----

BBOV\_III007710 (109) -----

BBOV\_III007740 (127) -----FEWYMLPEFGSRTTILNLLPDLASMLPEDCNEPIDFAVEKQIWKYLSSEHEQQAA-----

BBOV\_III011960 (128) -----VEWYLESKFINRAALRYAIPAYLAEKVLDCNEPISFATERRIRGFYSYSERMQRF-----

BBOV\_III001320 (136) -----

BBOV\_II001390 (128) -----VDWYLLPKPENRTALRYMLP SDLAEKVPEDYDEPIDFEVEELIRKYFSIDAKKMFN-----

BBOV\_II004160 (139) -----

BBOV\_II007780 (141) -----

BBOV\_II007820 (133) -----TVAMQDFQLNNDSGTSFFVMQPL-----

BBOV\_I003860 (139) -----

BBOV\_I003850 (133) -----

BBOV\_I005150 (128) -----VEWYLESKFINRAALRYAIPSYLAEKVLDCNEPISFATERRIRGFYSYSEEQQRL-----

BBOV\_I001370 (125) -----DWYLLPEPESRAALRYVLPRLDAAKVPEDCNEPIDTDVEKDIRRLFSSETFQKQRL-----

BBOV\_IV000090 (141) -----

BBOV\_IV000040 (128) -----IGWYLLPEPESRCALRYVLPGLAAKVPEDCNVPIKFEVEKDIRKLFSETFQKQGL-----

BBOV\_IV007960 (128) -----ADWYLLPEPESRAALRYVLP SDLAAKVPEDSNEAIKFEVEKDIRKLFSETFQKQGL-----

BBOV\_IV012140 (128) -----IGWYLLPEPESRAALRYVLPKDLAAKVPEDCNVPIKFEVEKDIRKLFSETFQKQRL-----

BBOV\_IV006430 (124) -----

|                              |                                             |     |
|------------------------------|---------------------------------------------|-----|
|                              | 301                                         | 338 |
| BBOV_I001180 No5'            | (285) NRFWYLHL-----                         |     |
| BBOV_I003890                 | (285) NRFLYFHL-----                         |     |
| BBOV_II004150                | (257) NRFWYLHL-----                         |     |
| BBOV_IV007970                | (276) NRFWYLHL-----                         |     |
| BBOV_II001380                | (254) LRLF-----                             |     |
| BBOV_III000050               | (234) -----                                 |     |
| BBOV_II000060                | (234) -----                                 |     |
| BBOV_IV007930                | (235) SLFLSHY-----                          |     |
| BBOV_III011930 minus ins     | (235) IRLSKCNGSN-----                       |     |
| BBOV_II004220                | (212) -----                                 |     |
| BBOV_I001120                 | (235) LPKPENKYYRRSKLPWELSIAPKDGNETILGAVEKRS |     |
| BBOV_II006810                | (232) NIEFLGGHMF-----                       |     |
| BBOV_III002340               | (251) MLLPSF-----                           |     |
| BBOV_II000400                | (225) EHASSYGHQSI-----                      |     |
| BBOV_I003880                 | (235) LRVHSYCWIG-----                       |     |
| BBOV_I001420 minus ins       | (235) HYSWSYAGSS-----                       |     |
| BBOV_IV006420 minus ins      | (270) LRLHSYFHGI-----                       |     |
| BBOV_II002280 minus ins      | (298) WSRLSCGFHW-----                       |     |
| BBOV_IV006390 no5' minus ins | (281) NRFWYLHL-----                         |     |
| BBOV_II002290                | (128) -----                                 |     |
| BBOV_II006800                | (143) -----                                 |     |
| BBOV_I001130                 | (160) -----                                 |     |
| BBOV_I001170                 | (183) -----                                 |     |
| BBOV_I001160                 | (184) LLQS-----                             |     |
| BBOV_III000020               | (157) -----                                 |     |
| BBOV_III000690               | (143) -----                                 |     |
| BBOV_III002350               | (143) -----                                 |     |
| BBOV_III007710               | (109) -----                                 |     |
| BBOV_III007740               | (183) MRPS-----                             |     |
| BBOV_III011960               | (184) LRLF-----                             |     |
| BBOV_III001320               | (136) -----                                 |     |
| BBOV_II001390                | (184) GIMFL-----                            |     |
| BBOV_II004160                | (139) -----                                 |     |
| BBOV_II007780                | (141) -----                                 |     |
| BBOV_II007820                | (157) -----                                 |     |
| BBOV_I003860                 | (139) -----                                 |     |
| BBOV_I003850                 | (133) -----                                 |     |
| BBOV_I005150                 | (184) LRLF-----                             |     |
| BBOV_I001370                 | (180) THGWSYQGNS-----                       |     |
| BBOV_IV000090                | (141) -----                                 |     |
| BBOV_IV000040                | (184) RREWNTGHMFSYG-----                    |     |
| BBOV_IV007960                | (184) THSWSTAMD-----                        |     |
| BBOV_IV012140                | (184) RREWNTGHMFSYG-----                    |     |
| BBOV_IV006430                | (124) -----                                 |     |

**B.**

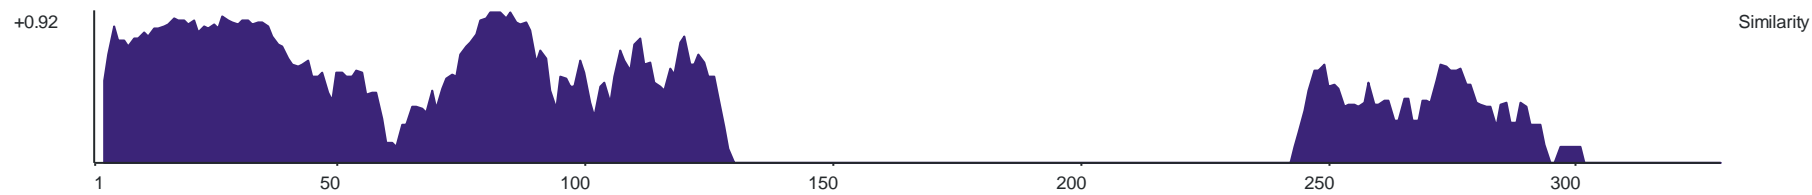

**C.**

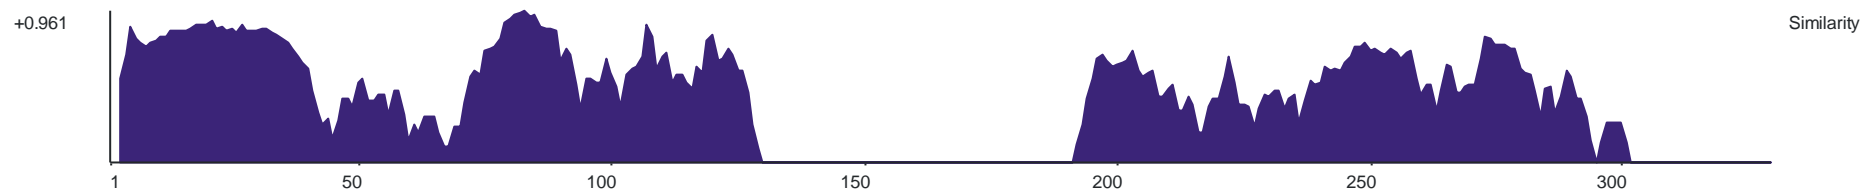

**D.**

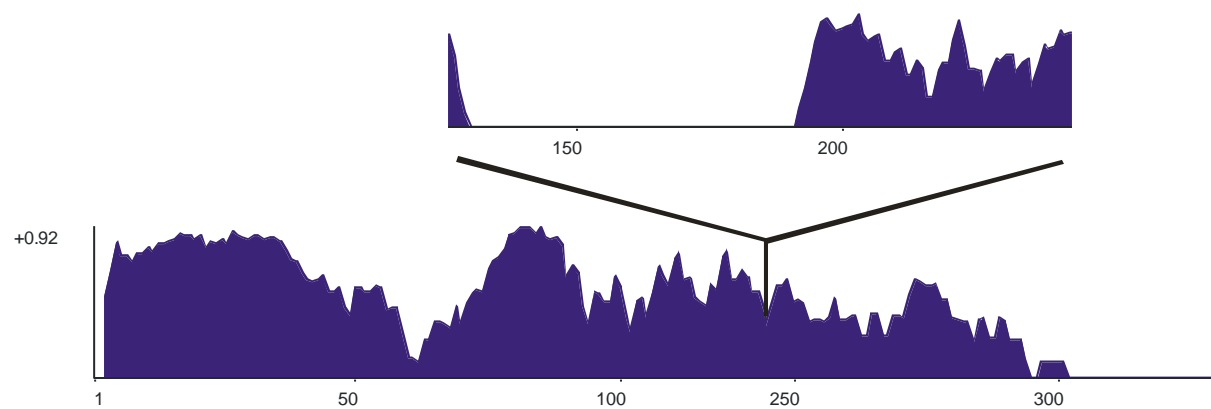

Supplement: mmc1.pdf [file mmc1.pdf]
